# Supplementary material
Source: HighWire-hosted journal article supplement (https://www.cmajopen.ca/highwire/filestream/85767/field_highwire_adjunct_files/2/open-2020-0230-original-submission.pdf)
Supplement: open-2020-0230-original-submission.pdf [file open-2020-0230-original-submission.pdf]

1  
2  
3  
4  
5 Incidence- and prevalence-based cost of illness after  
6 first hospitalization for heart failure, Nova Scotia,  
7  
8 Canada  
9  
10  
11  
12  
13  
14

15 Adrian R Levy PhD\*  
16 Karissa M Johnston PhD†  
17 Alexia Daoust MSc‡  
18 Andrew Ignaszewski MD FRCPC§  
19 Jonathan Fortier MSc‡  
20 Basia Rogula MSc†  
21 Paul Oh MD FRCPC ||  
22  
23  
24  
25  
26  
27

28 \*Dalhousie University, Halifax, Nova Scotia; †Broadstreet Health Economics & Outcomes  
29 Research, Vancouver, BC; ‡Novartis Pharmaceuticals Canada Inc, Montreal, Quebec; §University  
30 of British Columbia, Vancouver, BC; || Toronto Rehabilitation Institute; Toronto, Ontario  
31  
32  
33  
34  
35  
36  
37

38 Address for correspondence:

39 Adrian Levy PhD  
40 Dalhousie University  
41 #229, 5790 University Ave.  
42 Halifax, Nova Scotia, Canada B3H 1V7  
43 Phone: 902-494-7453  
44 Fax: 902 494 1597  
45 Email: adrian.levy@dal.ca  
46  
47  
48  
49  
50  
51

52 Word count (Introduction to Discussion): 2,492  
53  
54  
55  
56  
57  
58  
59  
60

## ABSTRACT

**OBJECTIVES:** The objective here was, among persons aged 50 years and older in Nova Scotia discharged alive after a first hospitalization for heart failure, to estimate mean age- and sex-specific prevalence- (2013-15) and incidence-based (2009-15) direct medical costs.

**BACKGROUND:** While it has been known that treating Canadians with heart failure makes it among the costliest of medical conditions, there is remarkable paucity of reliable information on direct medical costs of treatment.

**METHODS:** A retrospective cohort study was conducted using population-based administrative health databases in Nova Scotia. The cohort comprised adults with an incident hospitalization for heart failure between fiscal years 2009 and 2012 and followed until 2015. Costs were estimated using a bottom-up approach that included hospitalizations, physician visits, and cardiac medications (for those aged 65 years and older).

**RESULTS:** The cohort included 3,327 persons aged 50 years and older. The annual prevalence-based costs were approximately CDN2018 \$6,200 for both sexes. Hospitalizations formed the biggest component of costs and were about six times greater than medication and physician costs combined. Direct medical costs were highest in the year after hospital discharge, decreased to a relatively stable level, and increased in the last year of life.

**CONCLUSIONS:** Mean annual costs of heart failure in Nova Scotia were lower than values reported from the United States and comparable to European countries. These cost estimates for heart failure may be used to highlight areas of inefficiency, identify temporal changes, underscore areas of inequitable allocation of resources, and serve as inputs for economic analyses.

## INTRODUCTION

According to the Canadian Institute for Health Information, heart failure is the third most common reason for hospitalization in Canada<sup>1</sup>, has the highest rates rehospitalization<sup>2</sup>, and is the second most costly cause of hospitalization<sup>3</sup>. Treating people with heart failure thus imposes enormous economic burdens on all developed countries, accounting for between 1% and 2%<sup>4,5</sup>, and possibly as high as 3.2%<sup>6</sup>, of total annual direct health care costs. This occurs because heart failure is common and increases rapidly after middle age and requires high intensity care including regular hospitalizations. As such, it is considered among the most impactful and expensive conditions in Canada.<sup>7,8</sup>

Despite these startling figures, there exists scant reliable information on resource use and costs on which to base strategies and policies for managing Canadians diagnosed with heart failure. For example, one systematic review of cost-of-illness studies published between 2004 and 2016 yielded no Canadian studies on the topic<sup>9</sup> and another on studies published between 2003 and 2015<sup>10</sup> yielded only one Canadian study examining costs in the first year post-discharge.<sup>11</sup>

Studies from other jurisdictions can provide benchmarks and knowledge applicable to Canada. Mean annual cost-of-illness range from \$868 in 2014 South Korea<sup>12</sup> to \$25,532 in 2002 Germany (standardized to 2014 US dollars).<sup>13</sup> Investigators have shown that: the largest component of direct medical costs - over 50% - is hospitalization followed by medications<sup>9</sup>; that newly diagnosed patients have higher costs than those later in the course of disease; and that direct medical costs are increased during the last months of life<sup>14-16</sup>.

Reliable estimates of the costs of failure are required for important evaluative and research purposes. First, costs of illness can be used to identify differences in distributions of costs between demographic groups or jurisdictions that can be used to generate hypotheses about reducing costs, by highlighting areas where practice variations occur and identifying inefficient use resources. These hypotheses can, in turn, help determine research and funding priorities.<sup>17</sup>  
<sup>18</sup> Second, costs of illness studies are needed to quantify changes that may arise through new management approaches or public policies.<sup>16</sup> Third, from a public health perspective, the

1  
2  
3 distributions can be used to identify potential areas of inequitable allocation of resources.<sup>17</sup>  
4  
5 Fourth, they can provide more reliable inputs for lifetime cost-effectiveness models which are  
6  
7 often based on information from randomized trials or other sources that may not reflect actual  
8  
9 practice.

10  
11 Two approaches to costing of illness exist: incidence- and prevalence-based approaches. The  
12  
13 incidence-based approach involves calculating the costs of treatment for an individual in each  
14  
15 year after diagnosis until death (or resolution) and the prevalence-based approach estimates  
16  
17 the total cost to a population living with a disease incurred in a given calendar year.<sup>18</sup> There are  
18  
19 no published Canadian estimates using either approach for heart failure. The primary objective  
20  
21 here was, among persons aged 50 years and older in Nova Scotia discharged alive after a first  
22  
23 hospitalization for heart failure, to estimate mean overall and age- and sex-specific prevalence-  
24  
25 based (2013-15) and incidence-based direct medical costs (2009-15). We also report direct  
26  
27 medical costs in the two years prior to death.

## 28 29 **METHODS**

30  
31 A retrospective, population-based design was conducted using Nova Scotian administrative  
32  
33 health databases of hospital discharge abstracts, physician billing, prescription claims (for  
34  
35 persons aged 65 years and older), and death certificates. Linked using anonymized identifiers,<sup>19</sup>  
36  
37 these data include records for medical and hospital services of all provincial health plan  
38  
39 registrants in Nova Scotia (over 98% of 923,598 residents (183,820 aged 65 years and older)) in  
40  
41 2016. The study population consisted of all registered Nova Scotians aged 50 years and older  
42  
43 who had a “most responsible diagnosis” code of heart failure (International Classification of  
44  
45 Disease, Tenth revision (ICD10) code 150.x.) between 2009 and 2012, after removing those with  
46  
47 a hospital discharge abstract including any heart failure coded in 2007 or 2008. This algorithm  
48  
49 generally yields higher specificity and lower sensitivity, indicating high confidence that the  
50  
51 subjects in the sample were likely to have suffered acute decompensated heart failure<sup>20</sup> while  
52  
53 excluding some subjects.<sup>21, 22</sup> There is no *a priori* reason to think that patients with heart failure  
54  
55 coded with a different discharge diagnosis were systematically different than included subjects.  
56  
57  
58  
59  
60

1  
2  
3 Incidence rates per 100,000 were calculated using age- and sex-specific population  
4 denominators.<sup>23</sup> Duration of survival was calculated using the date of admission for the index  
5 hospitalization and the date of death on the death certificate. All-cause mortality was  
6 illustrated using Kaplan-Meier curves.  
7  
8  
9

### 10 11 *Resource Use and Costs*

12  
13  
14 Costing was done using a bottom-up (“person-based”) rather than a top-down (“population-  
15 based”) approach.<sup>24</sup> Medical resources included hospitalizations, physician visits, and, for  
16 persons aged 65 years and older, cardiac medications. Costs were stratified by sex and age (50  
17 to <65, 65-80, and >80 years) on the admission date of the date of admission for the index  
18 hospitalization. Costs were attributed to the year of follow-up after hospital discharge with  
19 subjects censored on the date of death, end of enrolment, or March 31, 2016.  
20  
21  
22  
23  
24  
25  
26

27 To facilitate future comparisons with other jurisdictions, rather than use resource-intensity-  
28 weights<sup>25</sup>, we estimated mean annual costs of hospitalization by multiplying the mean length of  
29 stay by a per-diem cost. The per-diem costs of hospital stays were tabulated separately for  
30 medical wards and intensive care units/coronary care units based on Canadian means from the  
31 Canadian Institute for Health Information,<sup>26</sup> inflated to 2018 using the consumer price index,<sup>27</sup>  
32 yielding values of \$1,105 for a day on a general ward and \$3,856 for a day in the intensive care  
33 unit. Hospital costs were attributed to the year in which the admission date discharge fell.  
34  
35  
36  
37  
38  
39  
40  
41  
42  
43  
44  
45  
46  
47  
48  
49  
50  
51  
52  
53  
54  
55  
56  
57  
58  
59  
60  
Physician costs were obtained from the Nova Scotia physician fee schedule.<sup>28</sup>

The costs of cardiovascular medications was based on Anatomical Therapeutic Chemical (ATC)  
Classification of Drugs (codes C09AA, C09B, C09CA, C09D, C02, C07, C08, C01DA, C10, C03,  
C03DA) obtained from the Nova Scotia Pharmacare Drug Formulary.<sup>29</sup> Daily medication costs  
were multiplied by the number of days supplied to obtain the total cost. Dispensing fees were  
excluded.

### *Cost of illness analysis*

1  
2  
3 Following conventional principles of cost of illness analysis,<sup>24</sup> we estimated both incidence- and  
4 prevalence-based costs of heart failure in Nova Scotia. These analyses differ from cost-  
5 effectiveness studies in that they do not include an intervention, comparator groups, or  
6 clinical outcomes. For the incidence-based costs, subjects were followed for up to seven years  
7 (2009 to 2015) after diagnosis, with a two-year washout period applied in 2007 and 2008. For  
8 the prevalence-based approach, annual mean costs were based on the three most recent years  
9 available (2013 to 15). We tabulated the costs in the two years prior to death, accounting for  
10 left-censoring for those who survived less than two years. Rather than medians, we report  
11 mean (and standard deviation) values as they provide more accurate estimates of total budgets  
12 and are thus more useful for policy-making.<sup>30, 31</sup> Costs were reported in 2018 Canadian dollars  
13 and we did not apply discounting.

14  
15  
16  
17  
18  
19  
20  
21  
22  
23  
24 This study was approved by the Dalhousie University Health Sciences Research Ethics Board.

## 25 26 27 **RESULTS**

28  
29  
30 A total of 3,327 persons aged 50 years and older were discharged from hospital with the most  
31 responsible diagnosis for heart failure between 2009 and 2012. The mean age was 77.6 years  
32 and 48.2% were women. Incidence rates increased by an order of magnitude in each age  
33 stratum, were higher among men than women in all three age strata, and declined in both  
34 sexes and all age strata and between 2009 and 2012 (Table 1).

35  
36  
37  
38  
39  
40 Mortality after heart failure diagnosis was high, with 20% of individuals dead within two  
41 months and a median survival of less than three years (Figure 1). Survival was slightly higher  
42 among men than women over seven years. Approximately 20% of individuals were alive seven  
43 years the initial diagnosis.

44  
45  
46  
47  
48  
49 Between 2013 and 2015, the mean annual prevalence-based costs for all patients was  
50 approximately \$6,200 for both men and women (Table 2). Approximately 85% of these costs  
51 were for hospitalizations, 10% for medications, and 5% for physician services. Mean annual  
52 prevalence-based costs declined over age stratum for both men and women; they were higher  
53  
54  
55  
56  
57  
58  
59  
60

1  
2  
3 for women than for men in age-sex stratum, however, because of different distributions of age,  
4 the weighted means of both sexes were similar. These mean costs had standard deviations  
5 greater than the means for each age-sex stratum, indicating that some subjects had very high  
6 costs. Among all subjects, hospitalizations formed the biggest cost driver, being about six times  
7 greater (\$5,874) than the medication (\$706) and physician (\$283) costs combined.  
8  
9  
10  
11

12  
13 For both sexes, mean incidence-based costs were highest in the first year after hospitalization  
14 for heart failure, ranging from approximately \$63,000 among men aged 50 to 64 years to  
15 almost \$160,000 among men over age 80 years and from \$90,000 among women aged 50 to 64  
16 years to almost \$140,000 among women over age 80 years (Table 3). For those who survived  
17 until the second year after discharge, costs declined approximately 80% over the subsequent  
18 years, and then increased in the last year of life. Direct medical costs in the year before death  
19 were slightly higher for men than women and between five and eight times higher than the  
20 second year before death. However, the costs in the year before death were still substantially  
21 lower than the first year after diagnosis (Table 3).  
22  
23  
24  
25  
26  
27  
28  
29  
30

## 31 **DISCUSSION**

32  
33 We observed that, for patients hospitalized for heart failure in Nova Scotia, costs were  
34 highest in the first year after hospitalization, then decreased to a relatively stable and lower  
35 level, and increased again toward the end of life. While Canadian investigators have reported  
36 increased costs at the end of life,<sup>11</sup> the pattern of costs after diagnosis until death has not been  
37 described. Selecting subjects based on the most responsible diagnosis led to an estimated  
38 annual mean prevalence-based costs in Nova Scotia of approximately \$6,200. This approach  
39 likely depicts a conservative estimate, termed “heart failure in isolation”,<sup>6</sup> and can  
40 appropriately represent the lower bound of the costs of illness. Including the costs of conditions  
41 that are comorbid with heart failure, such as hypertension, coronary artery disease, renal  
42 insufficiency, diabetes, chronic obstructive pulmonary disease<sup>32</sup> or other conditions,<sup>4</sup> termed  
43 “heart failure syndrome”, can appropriately represent the upper bound of the costs of illness.  
44  
45  
46  
47  
48  
49  
50  
51  
52  
53  
54  
55  
56  
57  
58  
59  
60

1  
2  
3 Comparing the mean annual cost of \$6,200 to estimates from other countries is fraught with  
4 conceptual and methodological challenges<sup>9</sup> (including selection of patients focusing on heart  
5 failure in isolation versus heart failure syndrome; choice of ICD codes; top down versus bottom  
6 up costing (and if the latter, the categories included); perspective (e.g. payer or societal); and  
7 others). Given those caveats, investigators have shown that the annual cost-of-illness ranges  
8 from \$868 in 2014 South Korea (2014 US dollars)<sup>12</sup> through \$20,245<sup>6</sup> (2012 US dollars) and  
9 \$20,618<sup>33</sup> (2008 US dollars) in the United States, to \$25,532 in 2002 Germany (2014 US  
10 dollars).<sup>13</sup>  
11  
12  
13  
14  
15  
16  
17  
18

19 This study was subject to important limitations. First, follow-up commenced for subjects after  
20 their first hospitalization, meaning that costs attributable to heart failure prior to this event  
21 were excluded, leading to an underestimation of the actual costs of illness. One key piece of  
22 information typically absent in administrative health data is the severity of illness, which, for  
23 heart failure, is often measured using the New York Heart Association (NYHA) four level  
24 categorization.<sup>34</sup> The first hospitalization for heart failure corresponds roughly to NYHA class III  
25 when disease severity increases and patients become more susceptible to breathlessness that  
26 requires hospitalization. In Poland, costs in NYHA class I and II were between 2/3 and 3/4 the  
27 costs in NYHA III.<sup>35</sup> Given the potentially larger number of individuals with less severe disease,  
28 the total costs could be substantial. One advantage of using the algorithm we used was that it  
29 corresponds to that used by other Canadian investigators.<sup>11, 21, 36</sup> Second, one challenge with  
30 bottom-up costing studies is external validity.<sup>16</sup> By using disaggregated values for length of stay  
31 and per diem costs, future investigators can compare values they observe to those in Nova  
32 Scotia. However, given the similarity between Canadian provinces and territories in the  
33 organization of care, use of common national clinical practice guidelines, similar financing  
34 mechanisms, and availability of administrative health data, lessens concerns that results are not  
35 applicable to other Canadian jurisdictions. Third, no information on emergency department and  
36 other outpatient clinic costs was included because the database in which these resources are  
37 curated, the National Ambulatory Care Reporting System, is incomplete in Nova Scotia. Fourth,  
38 as the perspective was that of a provincial health payer, we excluded the costs for informal care  
39 givers and lost productivity. One study showed these costs to be greater than the direct medical  
40  
41  
42  
43  
44  
45  
46  
47  
48  
49  
50  
51  
52  
53  
54  
55  
56  
57  
58  
59  
60



1  
2  
3 costs of heart failure<sup>37</sup>. A similar phenomenon may exist in Nova Scotia where a deterioration  
4 of health care facilities may increase the burden on home care.<sup>38</sup> Fourth, given the complexity  
5 of costing medications for heart failure,<sup>39</sup> we simplified attribution of costs by including ATC  
6 codes for cardiovascular medications only. Similarly, for physician visits, we attributed to heart  
7 failure all billings from family physicians, cardiologists, general internists, and cardiac surgeons.  
8 While both these assumptions led to misclassification, it is unclear the direction of the  
9 combined effect of these on the costs of illness.  
10  
11  
12  
13  
14  
15  
16

17 At least two findings regarding the epidemiology of heart failure in Nova Scotia bear greater  
18 scrutiny. First, the prevalence, incidence, and mortality in Nova Scotia were similar to other  
19 Canadian provinces (using the same algorithm of the most responsible diagnosis as that used  
20 here).<sup>21</sup> However, there seemed to be a trend of declining rates of hospital discharge for heart  
21 failure between 2009 and 2012. Such a finding, if confirmed elsewhere in Canada, would be of  
22 considerable interest and would parallel the decline observed in the United Kingdom. Using the  
23 same algorithm to select subjects as the one used here, in Canada, hospital costs were  
24 projected to increase from \$482 million (95% confidence interval (CI): \$464 to \$500 million) in  
25 2013 to \$722 million (95% CI: \$650-801) in 2030 (these costs standardized to 2014 Canadian  
26 dollars).<sup>36</sup> If the incidence is declining, these estimates may be shifted downwards. Second, the  
27 survival in Nova Scotia may be lower than reported the literature.<sup>40</sup>  
28  
29  
30  
31  
32  
33  
34  
35  
36  
37

38 The authors of “The Need for Heart Failure Advocacy in Canada” highlight the limited  
39 awareness about the “heart failure epidemic, the natural history of the disease, and the  
40 potential benefits of available therapies”.<sup>8</sup> Those authors call for action from all stakeholders  
41 that “outlines key targets for health care system redesign and policy initiatives that must be  
42 championed to affect meaningful change toward an optimal future for this disease state”.<sup>8</sup> Like  
43 elsewhere,<sup>9</sup> hospitalizations comprised the biggest component of costs in Nova Scotia. The  
44 finding of increased costs in the first year is also consistent with findings from other  
45 jurisdictions.<sup>2;31</sup> Taken together, these findings suggest that interventions designed to reduce  
46 hospitalizations, particularly in the year after the first hospitalization for heart failure, holds  
47 promise as a potentially useful starting point to evaluate policies and interventions such as  
48  
49  
50  
51  
52  
53  
54  
55  
56  
57  
58  
59  
60

1  
2  
3  
4  
5  
6  
7  
8  
9  
10  
11  
12  
13  
14  
15  
16  
17  
18  
19  
20  
21  
22  
23  
24  
25  
26  
27  
28  
29  
30  
31  
32  
33  
34  
35  
36  
37  
38  
39  
40  
41  
42  
43  
44  
45  
46  
47  
48  
49  
50  
51  
52  
53  
54  
55  
56  
57  
58  
59  
60

improved medication adherence,<sup>41</sup> pre-symptom identification,<sup>42</sup> telemedicine,<sup>43</sup> improved care coordination,<sup>44</sup> transfer to alternate levels of care,<sup>45</sup> clinical pathways,<sup>46</sup> or others<sup>47</sup> designed to avoid acute exacerbations and hospitalizations among heart failure patients.

Confidential

## REFERENCES

1. Canadian Institute for Health Information. Hospital Stays in Canada. 2020. Ottawa, Ont., CIHI.
2. Canadian Institute for Health Information. All-Cause Readmission to Acute Care and Return to the Emergency Department. 2012. Ottawa, Ont, CIHI.
3. Canadian Institute for Health Information. Which health conditions are the most expensive in 2016-2017? 2018. Ottawa, Ont, CIHI.
4. Bundkirchen A, Schwinger RH. Epidemiology and economic burden of chronic heart failure. *Eur Heart J* 2004; **6(suppl D)**:D57-60.
5. Liao L, Allen LA, Whellan DJ. Economic burden of heart failure in the elderly. *Pharmacoeconomics* 2008; **26**:447-62.
6. Voigt J, Sasha JM, Taylor A, Krucoff M, Reynolds MR, Michael GC. A reevaluation of the costs of heart failure and its implications for allocation of health resources in the United States. *Clin Cardiol* 2014; **37**:312-21.
7. Heart & Stroke Foundation. 2016 Report on the Health of Canadians: The Burden of Heart Failure. 2016. Ottawa, Heart & Stroke Foundation of Canada.
8. Virani SA, Bains M, Code J et al. The need for heart failure advocacy in Canada. *Can J Cardiol* 2017; **33**:1450-4.
9. Lesyuk W, Kriza C, Kolominsky-Rabas P. Cost-of-illness studies in heart failure: a systematic review 2004-2016. *BMC Cardiovasc Disord* 2018; **18**:74.
10. Shafie AA, Tan YP, Ng CH. Systematic review of economic burden of heart failure. *Heart Fail Rev* 2018; **23**:131-45.
11. Wijeyesundera HC, Austin PC, Wang X et al. The effect of multidisciplinary heart failure clinic characteristics on 1-year postdischarge health care costs: a population-based study. *Med Care* 2014; **52**:272-9.
12. Lee H, Oh SH, Cho H, Cho HJ, Kang HY. Prevalence and socio-economic burden of heart failure in an aging society of South Korea. *BMC Cardiovasc Disord* 2016; **16**:215.

- 1  
2  
3 13. Zugck C, Muller A, Helms TM et al. [Health economic impact of heart failure: An  
4 analysis of the nationwide German database]. *Dtsch Med Wochenschr* 2010; **135**:633-8.  
5  
6
- 7 14. Kaul P, McAlister FA, Ezekowitz JA et al. Resource use in the last 6 months of life  
8 among patients with heart failure in Canada. *Arch Intern Med* 2011; **171**:211-7.  
9  
10
- 11 15. Russo MJ, Gelijns AC, Stevenson LW et al. The cost of medical management in  
12 advanced heart failure during the final two years of life. *J Card Fail* 2008; **14**:651-8.  
13  
14
- 15 16. Singh GK, Davidson PM, Macdonald PS, Newton PJ. The use of hospital-based  
16 services by heart failure patients in the last year of life: a discussion paper. *Heart Fail Rev* 2019;  
17 **24**:199-207.  
18  
19
- 20 17. Ament A, Evers S. Cost of illness studies in health care: a comparison of two  
21 cases. *Health Policy* 1993; **26**:29-42.  
22  
23
- 24 18. Rice DP. Cost-of-illness studies: fact or fiction? *Lancet* 1994; 344(8936):1519-20.  
25  
26
- 27 19. [medicine.dal.ca/departments/department-sites/community-  
28 health/research/hdns.html](http://medicine.dal.ca/departments/department-sites/community-health/research/hdns.html). 2019.  
29  
30
- 31 20. Rosamond WD, Chang PP, Baggett C et al. Classification of heart failure in the  
32 atherosclerosis risk in communities (ARIC) study: a comparison of diagnostic criteria. *Circ Heart  
33 Fail* 2012; **5**:152-9.  
34  
35
- 36 21. Blais C, Dai S, Waters C et al. Assessing the burden of hospitalized and  
37 community-care heart failure in Canada. *Can J Cardiol* 2014; **30**:352-58.  
38  
39
- 40 22. Quach S, Blais C, Quan H. Administrative data have high variation in validity for  
41 recording heart failure. *Can J Cardiol* 2010; **26**:306-12.  
42  
43
- 44 23. Statistics Canada. CANSIM. 2019.  
45  
46
- 47 24. Larg A, Moss JR. Cost-of-illness studies: a guide to critical evaluation.  
48 *Pharmacoeconomics* 2011; **29**:653-71.  
49  
50
- 51 25. Canadian Institute for Health Information. Resource Indicators: DAD Resource  
52 Intensity Weights and Expected Length of Stay. 2020. Ottawa, Ont, CIHI.  
53  
54  
55  
56  
57  
58  
59  
60

- 1  
2  
3 26. [https://yourhealthsystem.cihi.ca/hsp/inbrief?lang=en#!/indicators/015/cost-of-](https://yourhealthsystem.cihi.ca/hsp/inbrief?lang=en#!/indicators/015/cost-of-a-standard-hospital-stay;/mapC1;mapLevel2;/)  
4 [a-standard-hospital-stay;/mapC1;mapLevel2;/](https://yourhealthsystem.cihi.ca/hsp/inbrief?lang=en#!/indicators/015/cost-of-a-standard-hospital-stay;/mapC1;mapLevel2;/). 2019.  
5  
6
- 7 27. <https://www150.statcan.gc.ca/n1/en/catalogue/62-001-X>. 2019.  
8
- 9 28. [www.medavie.bluecross.ca/static/MSI/PhysicianManual.pdf](http://www.medavie.bluecross.ca/static/MSI/PhysicianManual.pdf). 2019.  
10
- 11 29. [novascotia.ca/dhw/pharmacare/formulary.asp](http://novascotia.ca/dhw/pharmacare/formulary.asp). 2019.  
12
- 13 30. Guidelines for the Economic Evaluation of Health Technologies: Canada, 4th  
14 Edition. 2017. Ottawa, Canadian Agency for Drugs and Technology in Health.  
15
- 16 31. Wijeyesundera HC, Wang X, Tomlinson G, Ko DT, Krahn MD. Techniques for  
17 estimating health care costs with censored data: an overview for the health services researcher.  
18 *Clinicoecon Outcomes Res* 2019; **4**:145-55.  
19  
20
- 21 32. Hawkins NM, Virani S, Ceconi C. Heart failure and chronic obstructive pulmonary  
22 disease: the challenges facing physicians and health services. *Eur Heart J* 2013; **34**:2795-03.  
23  
24
- 25 33. Dunlay SM, Shah ND, Shi Q et al. Lifetime costs of medical care after heart failure  
26 diagnosis. *Circ Cardiovasc Qual Outcomes* 2011; **4**:68-75.  
27  
28
- 29 34. The Criteria Committee of the New York Heart Association. Nomenclature and  
30 Criteria for Diagnosis of Diseases of the Heart and Great Vessels (9th ed.). 1994; 253-56.  
31 Boston, Little, Brown & Co.  
32  
33
- 34 35. Czech M, Opolski G, Zdrojewski T et al. The costs of heart failure in Poland from  
35 the public payer's perspective. Polish programme assessing diagnostic procedures, treatment  
36 and costs in patients with heart failure in randomly selected outpatient clinics and hospitals at  
37 different levels of care: POLKARD. *Kardiol Pol* 2013; **71**:224-32.  
38  
39
- 40 36. Tran DT, Ohinmaa A, Thanh NX et al. The current and future financial burden of  
41 hospital admissions for heart failure in Canada: a cost analysis. *CMAJ Open* 2016; **4**:E365-70.  
42  
43
- 44 37. Delgado JF, Oliva J, Llano M et al. Health care and nonhealth care costs in the  
45 treatment of patients with symptomatic chronic heart failure in Spain. *Rev Esp Cardiol (Engl Ed)*  
46 **2014**; **67**:643-650.  
47  
48  
49  
50  
51  
52  
53  
54  
55  
56  
57  
58  
59  
60

- 1  
2  
3 38. Fierlbeck K. Nova Scotia : A Health System Profile. Toronto: University of Toronto  
4 Press; 2018.  
5  
6  
7 39. Conrad N, Judge A, Tran J et al. Temporal trends and patterns in heart failure  
8 incidence: a population-based study of 4 million individuals. Lancet 2018; **391**:572-80.  
9  
10  
11 40. Pocock SJ, Ariti CA, McMurray JJ et al. Predicting survival in heart failure: a risk  
12 score based on 39 372 patients from 30 studies. Eur Heart J 2013; **34**:1404-13.  
13  
14  
15 41. Wu JR, Moser DK, Chung ML, Lennie TA. Predictors of medication adherence  
16 using a multidimensional adherence model in patients with heart failure. J Card Fail 2008;  
17 **14**:603-14.  
18  
19  
20  
21 42. Abraham WT, Adamson PB, Bourge RC et al. Wireless pulmonary artery  
22 haemodynamic monitoring in chronic heart failure: a randomised controlled trial. Lancet 2011;  
23 **377**:658-66.  
24  
25  
26  
27 43. Voigt J, Mosier M. Remote care costs for congestive heart failure: a systematic  
28 review and meta-analysis of randomized controlled trials in the United States comparing  
29 remote versus more intensive care settings. Congest Heart Fail 2013; **19**:192-9.  
30  
31  
32  
33 44. Bradley EH, Curry L, Horwitz LI et al. Hospital strategies associated with 30-day  
34 readmission rates for patients with heart failure. Circ Cardiovasc Qual Outcomes 2013; **6**:444-  
35 50.  
36  
37  
38  
39 45. Allen LA, Hernandez AF, Peterson ED et al. Discharge to a skilled nursing facility  
40 and subsequent clinical outcomes among older patients hospitalized for heart failure. Circ Heart  
41 Fail 2011; **4**:293-300.  
42  
43  
44  
45 46. Hollenberg SM, Warner SL, Ahmad T et al. 2019 ACC Expert Consensus Decision  
46 Pathway on Risk Assessment, Management, and Clinical Trajectory of Patients Hospitalized with  
47 Heart Failure: A Report of the American College of Cardiology Solution Set Oversight  
48 Committee. J Am Coll Cardiol 2019; **74**:1966-2011.  
49  
50  
51  
52 47. Wright SP, Verouhis D, Gamble G, Swedberg K, Sharpe N, Doughty RN. Factors  
53 influencing the length of hospital stay of patients with heart failure. Eur J Heart Fail 2003;  
54 **5**:201-9.  
55  
56  
57  
58  
59  
60

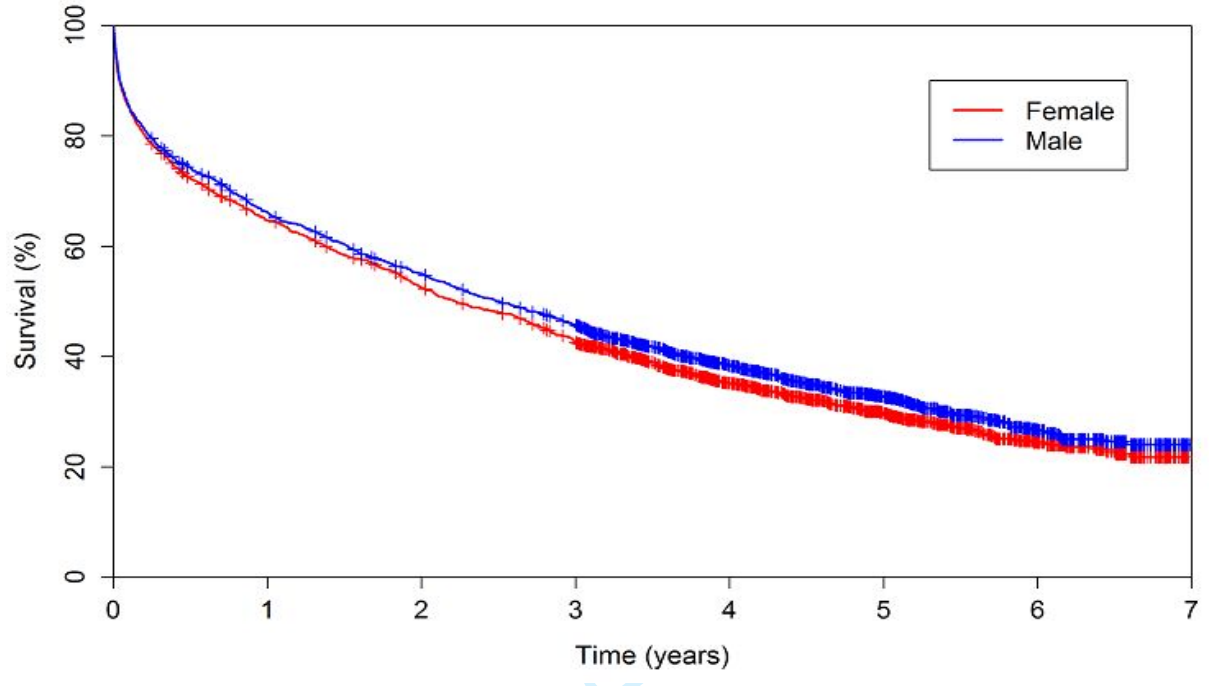

1  
2  
3  
4  
5  
6  
7  
8  
9  
10  
11  
12  
13  
14  
15  
16  
17  
18  
19  
20  
21  
22  
23  
24  
25  
26  
27  
28  
29  
30  
31  
32  
33  
34  
35  
36  
37  
38  
39  
40  
41  
42  
43  
44  
45  
46  
47  
48  
49  
50  
51  
52  
53  
54  
55  
56  
57  
58  
59  
60

| Age (years)                           | 2009        | 2010        | 2011        | 2012        |
|---------------------------------------|-------------|-------------|-------------|-------------|
| <b>Men</b>                            |             |             |             |             |
| <b>50 – 64</b>                        | 83 (84)     | 91 (94)     | 81 (85)     | 67 (71)     |
| <b>65 – 80</b>                        | 414 (216)   | 368 (198)   | 322 (180)   | 294 (173)   |
| <b>&gt; 80</b>                        | 1,505 (178) | 1,159 (141) | 1,307 (161) | 1,109 (141) |
| <b>All men <math>\geq</math> 50</b>   | 289 (478)   | 256 (433)   | 246 (426)   | 217 (385)   |
| <b>Women</b>                          |             |             |             |             |
| <b>50 – 64</b>                        | 44 (46)     | 39 (42)     | 35 (39)     | 30 (33)     |
| <b>65 – 80</b>                        | 292 (173)   | 221 (134)   | 226 (141)   | 213 (139)   |
| <b>&gt; 80</b>                        | 925 (213)   | 987 (229)   | 991 (231)   | 779 (185)   |
| <b>All women <math>\geq</math> 50</b> | 230 (432)   | 211 (405)   | 210 (411)   | 178 (357)   |
| <b>Both Men and Women</b>             |             |             |             |             |
| <b>Age-adjusted</b>                   | 258 (910)   | 232 (838)   | 227 (837)   | 196 (742)   |

\*Based on a most responsible diagnosis of International Classification of Disease, Tenth revision code 150.x.



|                           | Hospitalizations      |                   | Outpatient Physician visits |           | Outpatient cardiovascular medications <sup>†</sup> |             | Total <sup>‡</sup> |
|---------------------------|-----------------------|-------------------|-----------------------------|-----------|----------------------------------------------------|-------------|--------------------|
| Age (y)                   | Length of stay (days) | Cost <sup>§</sup> | Visits                      | Cost      | Dispensations                                      | Cost        | Cost               |
|                           | Mean (SD)             | Mean (SD)         | Mean (SD)                   | Mean (SD) | Mean (SD)                                          | Mean (SD)   | Mean (SD)          |
| <b>Men</b>                |                       |                   |                             |           |                                                    |             |                    |
| <b>50 – 64</b>            | 5.4 (12.8)            | 7,522 (17,106)    | 17.1 (24.3)                 | 433 (768) | NA                                                 | NA          | 7,956 (17,439)     |
| <b>65 – 80</b>            | 5.3 (14.0)            | 6,701 (16,909)    | 14.1 (26.0)                 | 354 (783) | 26.4 (43.4)                                        | 830 (978)   | 7,886 (17,370)     |
| <b>&gt; 80</b>            | 3.3 (13.0)            | 3,981 (15,304)    | 8.7 (19.7)                  | 188 (506) | 13.3 (33.6)                                        | 409 (783)   | 4,577 (15,689)     |
| <b>All men</b>            | 4.6 (13.4)            | 5,880 (16,444)    | 12.7 (23.8)                 | 309 (699) | 20.5 (39.8)                                        | 642 (920)   | 6,189 (16,827)     |
| <b>Women</b>              |                       |                   |                             |           |                                                    |             |                    |
| <b>50 – 64</b>            | 7.0 (17.3)            | 10,491 (36,257)   | 16.5 (25.7)                 | 404 (787) | NA                                                 | NA          | 10,895 (36,731)    |
| <b>65 – 80</b>            | 5.9 (15.1)            | 7,188 (17,769)    | 14.8 (23.2)                 | 336 (659) | 34.4 (52.7)                                        | 927 (1,312) | 8,452 (18,253)     |
| <b>&gt; 80</b>            | 3.3 (11.9)            | 4,102 (16,621)    | 8.2 (18.8)                  | 170 (447) | 20.3 (39.3)                                        | 658 (743)   | 4,930 (16,989)     |
| <b>All women</b>          | 4.6 (13.8)            | 5,868 (19,943)    | 11.4 (21.6)                 | 254 (579) | 26.0 (45.7)                                        | 767 (1,022) | 6,122 (20,295)     |
| <b>Both Men and Women</b> |                       |                   |                             |           |                                                    |             |                    |
| <b>All subjects</b>       | 4.6 (13.6)            | 5,874 (18,213)    | 12.1 (22.7)                 | 283 (644) | 23.3 (43.0)                                        | 706 (975)   | 6,157 (18,578)     |

NA: not available

<sup>†</sup> ATCs for cardiovascular medications: C09AA, C09B, C09CA, C09D, C02, C07, C08, C01DA, C10, C03, C03DA.

<sup>‡</sup> Includes only costs of hospitalizations and physician visits for rows subjects under 65 y and additionally includes cardiovascular medications for subjects 65-80 y and >80 y.

<sup>§</sup> Per-diem costs of general ward: \$1,105 and ICU: \$3,856.

1  
2  
3  
4  
5  
6  
7  
8  
9  
10  
11  
12  
13  
14  
15  
16  
17  
18  
19  
20  
21  
22  
23  
24  
25  
26  
27  
28  
29  
30  
31  
32  
33  
34  
35  
36  
37  
38  
39  
40  
41  
42  
43  
44  
45  
46  
47

|                     | Year after diagnosis |                 |                 |                 |                 |                 |                 |
|---------------------|----------------------|-----------------|-----------------|-----------------|-----------------|-----------------|-----------------|
| Age (y)             | 1                    | 2               | 3               | 4               | 5               | 6               | 7               |
|                     | <b>Men</b>           |                 |                 |                 |                 |                 |                 |
| <b>50 – 64*</b>     | 62,701 (148,268)     | 16,592 (46,630) | 17,675 (55,711) | 15,957 (48,843) | 17,258 (78,985) | 13,005 (49,298) | 7,529 (26,088)  |
| <b>65 – 80†</b>     | 106,701 (200,283)    | 22,723 (65,958) | 24,506 (57,294) | 18,249 (47,557) | 18,087 (53,094) | 15,512 (61,669) | 5,059 (10,568)  |
| <b>&gt; 80†</b>     | 159,164 (215,536)    | 22,376 (48,152) | 27,580 (64,700) | 16,753 (45,100) | 9,295 (17,657)  | 22,159 (48,409) | 20,341 (39,897) |
| <b>All men*</b>     | 116,558 (200,390)    | 20,549 (56,949) | 22,830 (58,749) | 16,834 (47,434) | 15,845 (59,371) | 15,384 (55,234) | 8,972 (25,648)  |
|                     | <b>Women</b>         |                 |                 |                 |                 |                 |                 |
| <b>50 – 64*</b>     | 90,440 (201,567)     | 25,292 (88,160) | 13,422 (26,240) | 22,783 (56,948) | 11,772 (35,858) | 16,442 (40,347) | 1,474 (3,705)   |
| <b>65 – 80†</b>     | 103,845 (191,736)    | 20,369 (47,390) | 19,409 (48,489) | 17,869 (45,367) | 16,194 (51,668) | 13,312 (35,428) | 14,368 (41,594) |
| <b>&gt; 80†</b>     | 139,518 (179,936)    | 21,878 (48,755) | 18,613 (48,338) | 14,702 (39,266) | 9,715 (36,254)  | 10,746 (29,286) | 12,691 (37,052) |
| <b>All women*</b>   | 120,874 (187,658)    | 20,982 (54,750) | 17,633 (45,956) | 16,884 (45,206) | 12,653 (44,263) | 12,650 (34,519) | 11,131 (36,491) |
|                     | <b>All</b>           |                 |                 |                 |                 |                 |                 |
| <b>All subjects</b> | 118,640 (194,335)    | 20,756 (55,899) | 20,390 (53,177) | 16,857 (46,393) | 14,369 (52,921) | 14,138 (46,924) | 9,982 (31,134)  |

\* Includes costs of hospitalizations and physician visits.

† Includes costs of hospitalizations, physician visits, and outpatient cardiovascular medications
